and design, acquisition of data, or analysis and interpretation of data; (b) drafting or revising the article for intellectual content; (c) final approval of the published article; and (d) agreement to be accountable for all aspects of the article thus ensuring that questions related to the accuracy or integrity of any part of the article are appropriately investigated and resolved.

P.A. Kavsak, financial support, statistical analysis, administrative support; J. Cerasuolo, statistical analysis; R. Perez, statistical analysis; H. Seow, administrative support.

**Authors' Disclosures or Potential Conflicts of Interest:** Upon manuscript submission, all authors completed the author disclosure form. Disclosures and/or potential conflicts of interest:

**Employment or Leadership:** None declared. **Consultant or Advisory Role** P.A. Kavsak, Abbott Laboratories, Abbott Point of Care, Beckman Coulter, Ortho Clinical Diagnostics, Randox Laboratories, Roche Diagnostics, Siemens Healthcare Diagnostics. **Stock Ownership** None declared.

**Honoraria** P.A. Kavsak, Abbott Laboratories, Abbott Point of Care, Beckman Coulter, Ortho Clinical Diagnostics, Randox Laboratories, Roche Diagnostics, Siemens Healthcare Diagnostics. **Research Funding** P.A. Kavsak, grants/reagents from Abbott Laboratories, Beckman Coulter, Ortho Clinical Diagnostics, Randox Laboratories, Roche Diagnostics, Siemens Healthcare Diagnostics, grants from the Canadian Institutes of Health Research (155964). This study was supported by ICES, which is funded by an annual grant from the Ontario Ministry of Health and Long-Term Care (MOHLTC). **Expert Testimony** None declared. **Patents** McMaster University has filed patents with P.A. Kavsak and A. Worster listed as an inventor in the acute cardiovascular biomarker field, in particular, a patent has been filed on aspects related to the data presented in this study "A LABORATORY SCORE FOR RISK STRATIFICATION FOR PATIENTS WITH POSSIBLE CARDIAC INJURY." Application Publication number: 20180252724

**Disclaimer:** Content enclosed are based on data provided by CIHI. Analyses, opinions, and statements

expressed herein are those of the authors and not necessarily those of CIHI; no endorsement is intended or should be inferred.

**Acknowledgments:** We thank IMS Brogan Inc. for use of their Drug Information Database.

© American Association for Clinical Chemistry 2020. All rights reserved.

For permissions, please email: journals.permissions@oup.com.

## REFERENCES

1. Tomaszewski CA, Nestler D, Shah KH, Sudhir A, Brown MD, American College of Emergency Physicians Clinical Policies Subcommittee (Writing Committee) on Suspected Non-ST-Elevation Acute Coronary Syndromes. Clinical policy: critical issues in the evaluation and management of emergency department patients with suspected non-ST-elevation acute coronary syndromes. *Ann Emerg Med* 2018;72:e65–e106.
2. Lau G, Koh M, Kavsak PA, Schull MJ, Armstrong DW, Udell JA, et al. Clinical outcomes for chest pain patients discharged home from emergency departments utilizing high-sensitivity vs. conventional cardiac troponin assays. *Am Heart J* 2020;221:84–94.
3. Chew DP, Lambrakis K, Blyth A, Seshadri A, Edmonds MJR, Briffa T, et al. A randomized trial of a 1-hour troponin t protocol in suspected acute coronary syndromes: The Rapid Assessment of Possible Acute Coronary Syndrome in the Emergency Department with High-Sensitivity Troponin T Study (RAPID-TnT). *Circulation* 2019;140:1543–56.
4. Kavsak PA, Neumann JT, Cullen L, Than M, Shortt C, Greenslade JH, et al. Clinical chemistry score versus high-sensitivity cardiac troponin I and T tests alone to identify patients at low or high risk for myocardial infarction or death at presentation to the emergency department. *CMAJ* 2018;190:E974–E984.

5. Kavsak PA, McRae A, Vatanpour S, Ismail OZ, Worster A. A multicenter assessment of the sensitivity and specificity for a single high-sensitivity cardiac troponin test at emergency department presentation for hospital admission. *J Appl Lab Med* 2019;4:170–9.

Peter A. Kavsak<sup>a,\*</sup>  
Joshua O. Cerasuolo<sup>b</sup>  
Dennis T. Ko<sup>c</sup>  
Richard Perez<sup>b</sup>  
Hsien Seow<sup>b</sup>  
Jinhui Ma<sup>d</sup>  
Andrew Worster<sup>e</sup>

<sup>a</sup>Department of Pathology and Molecular Medicine, McMaster University, Hamilton, ON, Canada

<sup>b</sup>ICES McMaster, Faculty of Health Sciences, McMaster University, Hamilton, ON, Canada

<sup>c</sup>ICES, Toronto, ON, Canada

<sup>d</sup>Department of Health Research Methods, Evidence and Impact, McMaster University, Hamilton, ONT, Canada

<sup>e</sup>Division of Emergency Medicine, McMaster University, Hamilton, ON, Canada

\*Address correspondence to this author at: Hospital and Cancer Centre, 711 Concession St, Hamilton, ON Canada L8V 1C3. Fax 905-381-7066; e-mail kavsakp@mcmaster.ca

DOI: 10.1093/jalm/jfaa074

## COVID-19 in Pediatrics: A Laboratory Perspective

### TO THE EDITOR:

Since the initial outbreak of the Corona Virus Disease 2019 (COVID-19) in Wuhan, China, December, 2019, the pathogenic virus, Severe Acute Respiratory Syndrome Corona-

virus 2 (SARS-CoV-2) has rapidly spread worldwide. On March 11th, 2020, the World Health Organization declared a pandemic of SARS-CoV-2 with nearly 118 000 cases and 4300 deaths confirmed in 114 countries. The United States has thus far reported nearly 1, 118 000 cases of confirmed infections and over 64 000 deaths, as of May 1st, 2020.

People of all ages, including infants and children, are susceptible to SARS-CoV-2 infection. The first infected pediatric case was reported in the city of Shenzhen, 1000 km away from the outbreak center, Wuhan. The very first review that includes pediatric patients reported by January 30, 2020, 9692 confirmed cases of SARS-CoV-2 in 31 provinces and cities in China. Among them, there were 28 cases aged from 1 month to 17 years (1). A later article reported 416 children under 10 years old (0.9%) out of 44 672 confirmed cases in China by February 11th, 2020, with the expansion of diagnostic criteria to include imaging findings (2). Another publication included 2143 pediatric patients with COVID-19 reported to the Chinese Center for Disease Control and Prevention from January 16 to February 8, 2020 (3). There were 731 (34.1%) laboratory-confirmed cases and 1412 (65.9%) suspected cases. The

median age of all patients was 7 years (interquartile range 2–13), and 1213 cases (56.6%) were male.

In the report from China by February 11th, 2020 (2), with 416 children younger than 10 years, 134 cases had clinical records documented. Most of the infections in children were diagnosed from familial clusters. The main clinical manifestations in children were fever (76.1%); cough; followed by vomiting, diarrhea, and other digestive system symptoms; and viral pneumonia-like changes in chest imaging (70.4%). Two critical cases that progressed rapidly to respiratory failure after onset have been reported in China, one with congenital heart disease and the other with bilateral hydronephrosis and calculus of the left kidney (1, 4). Compared to infected adults, children tend to have milder clinical symptoms, faster recovery, and better prognosis. On the other hand, the asymptomatic infected children may act as “carriers” and potentially shed virus, and this poses a serious challenge to people in close contact, especially pediatric medical workers. Notably, although a positive viral nucleic acid test is the “gold standard,” some cases need 2 or even 3 tests to be confirmed, so clinical “false negative” children with negative nucleic acid testing results may still be a potential

source of infection. It is suggested that in clinical suspected cases, continuous and repeated sample collections are needed to improve the accuracy (4).

Dong et al. (3) reported epidemiological findings in both laboratory-confirmed cases ( $N=731$ ) and suspected cases ( $N=1412$ ) of children. Suspected cases were identified based on 2 of the 3 following conditions after excluding influenza and other common respiratory infections: (a) fever or respiratory symptoms or digestive symptoms or fatigue; (b) normal or decreased white blood cell count with decreased lymphocyte count or increased C-reactive protein levels; (c) abnormal chest X-ray imaging (pneumonia-like changes) and ground glass opacities on chest computed tomography. Suspected cases meeting either one of the following criteria were defined as confirmed cases: (a) Nasal and pharyngeal swab specimens or blood samples tested positive for SARS-CoV-2 nucleic acid using a realtime reverse-transcriptase polymerase-chain-reaction (RT-PCR) assay; (b) Genetic sequencing of respiratory tract or blood samples is highly homologous with SARS-CoV-2. Among the 2143 suspected and confirmed cases reported by Dong et al., 94.1% of all patients were asymptomatic, mild, or moderate (4.4,

50.9, and 38.8%, respectively) cases. The proportion of severe or critical cases was 10.6, 7.3, 4.2, 4.1, and 3.0% for the age groups of <1, 1–5, 6–10, 11–15, and ≥16 years, respectively. One fatality of a 14-year-old boy in Hubei province was reported. In contrast, Lu X et al. (5) reviewed the symptoms commonly found in 1391 children who had been confirmed to have SARS-CoV-2 infection from a single center designated to treat infected children under 16 years of age in Wuhan. They found that 15.8% of the cases were asymptomatic, and the most common symptoms were cough, red/sore throat, and fever. Taken the limited data available to date, the percentage for asymptomatic pediatric patients may range from 4.4 to 15.8%.

Regarding laboratory tests, based on the several articles on

pediatric patients cited above (1, 2, 4) and an all-age study with 1099 patients that included 9 patients aged 0–14 years (6), no differences have been reported in clinical findings between children and adults. Lippi and Plebani (7) have summarized laboratory findings from published literature, and we hereby show in Table 1 the characteristic laboratory findings in children. In the early stage of the onset, the total number of white blood cells in the peripheral blood was normal or decreased, the lymphocyte count decreased, and some patients had decreased albumin and increased liver enzymes, muscle enzymes, including increased CK and myoglobin, and increased lactate dehydrogenase (LDH). Most patients had normal or slightly elevated C-reactive protein, increased erythrocyte sedimentation rate, and normal

procalcitonin. In severe cases, D-dimer as well as procalcitonin increased, ferritin levels increased, and the number of peripheral blood lymphocytes decreased progressively (Table 1). In contrast, the 2003 SARS-CoV infection resulted in high fever in most pediatric patients. Some patients had temporary abnormality of myocardial enzymes and liver function (8).

There were a number of neonatal infections reported, posing the question of possible mother-to-child vertical transmission. Chen et al. (9) reported in 21 pregnant women with confirmed infection in late pregnancy, the amniotic fluid, placenta samples of mothers, and pharyngeal swabs of newborns (collected twice in 24 hours) showed negative results for nucleic acid test. The pharyngeal swab nucleic acid tests of 14 neonates were also

**Table 1. Biochemical patterns in pediatric COVID-19 patients**

| Albumin                                           | Normal or decreased                                                                   |
|---------------------------------------------------|---------------------------------------------------------------------------------------|
| Alanine and aspartate aminotransferases           | Increased                                                                             |
| Creatine kinase, myoglobin, lactate dehydrogenase | Increased                                                                             |
| Creatinine, blood urea nitrogen                   | Increased                                                                             |
| D-dimer, CRP, procalcitonin                       | Normal or increased, progressive increases in patients associated with worse outcomes |
| Bilirubin                                         | Normal or increased                                                                   |
| ESR                                               | Normal or increased                                                                   |
| Cardiac troponin                                  | Increased in patients that progress to cardiac symptoms                               |

negative on days 5 and 10 of their hospitalization (9). Nevertheless, Zeng et al. (10) reported 3 neonates with symptomatic COVID-19 (9%) out of 33 neonates born to mothers with COVID-19. The authors suggested that since strict infection control and prevention procedures were implemented during the delivery, the route of vertical maternal-fetal transmission remains a possibility, despite that other studies found all samples from affected mothers, including amniotic fluid, cord blood, and breast milk, were negative for SARS-CoV-2 (9, 11).

In summary, people of all ages are generally susceptible to SARS-CoV-2 infections, with the propensity increasing with age and comorbidities. Within the pediatric population, infants had higher rates of serious illness than older children. Most of the infections in children are familial clusters that are asymptomatic (up to 16%) or have mild symptoms (up to 51%). These children could be potential sources of infection. The asymptomatic pneumonia found in pediatric patients indicates follow up for these patients should include pulmonary function assessment. To date, critical cases in children identified all had underlying conditions and progressed

rapidly, so children with underlying diseases should be aggressively protected by early isolation. Although no laboratory evidence for mother-to-child vertical transmission has been found, the fact that up to 10% neonates born to infected mothers developed symptomatic COVID-19 still suggests that vertical transmission cannot be ruled out and newborns from infected mothers should be isolated immediately after delivery to avoid postnatal exposure. Biochemical features in pediatric patients will be further defined with increased numbers of confirmed patients in the pediatric ages, who have not thus far been tested because of mild clinical symptoms. It is important to note that biochemical findings in the pediatric population in the United States may be different and need to be further studied. Biochemical findings in children, along with levels of cytokines and T cell responses in this population, as well as assessment of antibody titers, may give us mechanistic insights into SARS-CoV-2 infection, morbidity, and mortality.

**Author Contributions:** All authors confirmed they have contributed to the intellectual content of this paper and have met the following 4 requirements: (a) significant contributions to the conception and design, acquisition of data, or analysis and interpretation of data; (b) drafting or revising the article for intellectual

content; (c) final approval of the published article; and (d) agreement to be accountable for all aspects of the article thus ensuring that questions related to the accuracy or integrity of any part of the article are appropriately investigated and resolved.

**Authors' Disclosures or Potential Conflicts of Interest:** No authors declared any potential conflicts of interest.

© American Association for Clinical Chemistry 2020. All rights reserved.  
For permissions, please email: journals.permissions@oup.com.

## REFERENCES

1. Shen K, Yang Y, Wang T, Zhao D, Jiang Y, Jin R, et al. Diagnosis, treatment, and prevention of 2019 novel coronavirus infection in children: experts' consensus statement. *World J Pediatr* 2020;doi: 10.1007/s12519-020-00362-4.
2. Novel Coronavirus Pneumonia Emergency Response Epidemiology Team. The epidemiological characteristics of an outbreak of 2019 novel coronavirus diseases (COVID-19) in China. *Zhonghua Liu Xing Bing Xue Za Zhi* 2020;41:145–51.
3. Dong Y, Mo X, Hu Y, Qi X, Jiang F, Jiang Z, et al. Epidemiological characteristics of 2143 pediatric patients with 2019 coronavirus disease in China. *Pediatrics* 2020; 145:e20200702.
4. Yang P, Liu P, Li D, Zhao D. Coronavirus disease 2019, a growing threat to children? *J Infect* 2020; 80:671–93.
5. Lu X, Zhang L, Du H, Zhang J, Li YY, Qu J, et al. SARS-CoV-2 infection in children. *N Engl J Med* 2020;382:1663–5.
6. Guan W-J, Ni Z-Y, Hu Y, Liang W-H, Ou C-Q, He J-X, et al. Clinical characteristics of coronavirus disease 2019 in China. *N Engl J Med* 2020; 382:1708–20.
7. Lippi G, Plebani M. Laboratory abnormalities in patients with

- COVID-2019 infection. Clin Chem Lab Med 2020;doi: 10.1515/cclm-2020-0198.
8. Li Z, Zhi Shen K, Ling Wei X, Miao Wang H, Ling Lu J, Tian H, et al. Clinical analysis of pediatric SARS cases in Beijing. Zhonghua Er Ke Za Zhi 2003;41:574–7.
  9. Chen H, Guo J, Wang C, Luo F, Yu X, Zhang W, et al. Clinical characteristics and intrauterine vertical transmission potential of COVID-19 infection in nine pregnant women: a retrospective review of medical records. Lancet 2020;395:809–15.
  10. Zeng L, Xia S, Yuan W, Yan K, Xiao F, Shao J, et al. Neonatal early-onset infection with SARS-CoV-2 in 33 neonates born to mothers with COVID-19 in Wuhan, China. JAMA Pediatr 2020;doi: 10.1001/jamapediatrics.2020.0878.
  11. Zhu H, Wang L, Fang C, Peng S, Zhang L, Chang G, et al. Clinical analysis of 10 neonates born to mothers with 2019-nCoV pneumonia. Transl Pediatr 2020;9: 51–60.

**Jing Cao<sup>a</sup>**  
**Sridevi Devaraj<sup>a,\*</sup>**

<sup>a</sup>*Department of Pathology & Immunology, Baylor College of Medicine, and Department of Pathology, Texas Children's Hospital, Houston, TX, USA.*

---

\*Address correspondence to this author at: Department of Pathology & Immunology, Baylor College of Medicine, Department of Pathology, Section of Clinical Chemistry, Texas Children's Hospital, 6621 Fannin Street, Houston TX 77030. Fax 832-825-5110; e-mail: sxdevara@texaschildrens.org.

---

DOI: 10.1093/jalm/jfaa065
